# Supplementary material for: Delivery of Mesenchymal Stem Cells from Gelatin-Alginate Hydrogels to Stomach Lumen for Treatment of Gastroparesis
Source: Preprints.org preprint supplement (doi:10.20944/preprints201801.0033.v1), 2018-01-05

Supplementary Figure 1. Confocal Imaging of cells in gels counterstained for a. Actin, b. DAPI (nucleus) and c. merged (actin and DAPI). In d. Shown is a z-scan where maximum cell density is detected at the center of the gel.

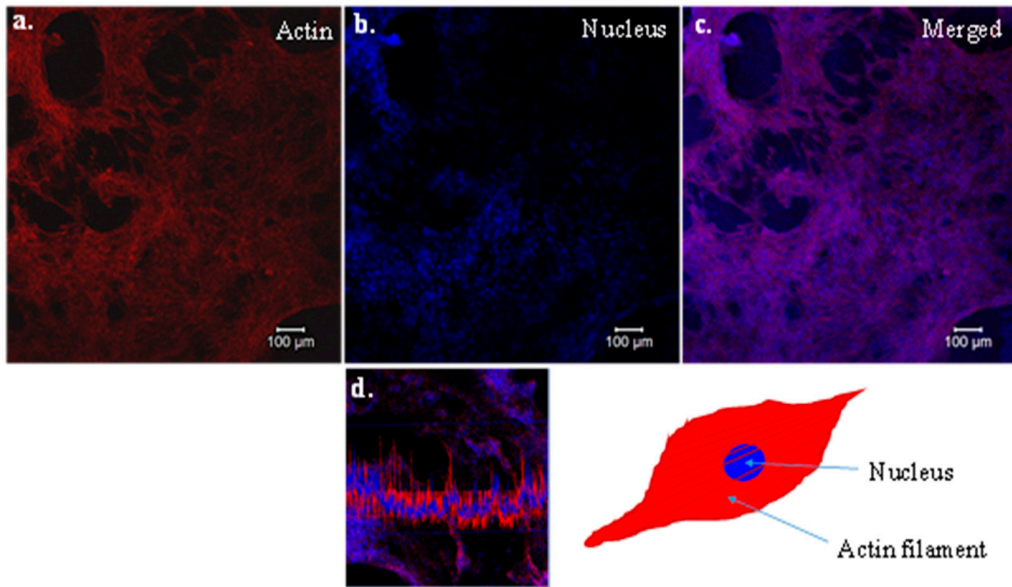

Supplement: Supplementary file 1 [file supplementary]
